# Supplementary material for: Fabrication of Nitrogen-Doped Reduced Graphene Oxide Modified Screen Printed Carbon Electrode (N-rGO/SPCE) as Hydrogen Peroxide Sensor
Source: MDPI journal article supplement (doi:10.3390/nano12142443), 2022-07-16
Supplement: s1 [file s1]

## **Supplementary information**

### **Fabrication of Nitrogen-Doped Reduced Graphene Oxide Modified Screen Printed Carbon Electrode (N-rGO/SPCE) as Hydrogen Peroxide Sensor**

**Khursheed Ahmad and Haekyoung Kim \***

School of Materials Science and Engineering, Yeungnam University, Gyeongsan 38541, Korea;  
khursheed.energy@gmail.com

\*Correspondence: hkkim@ynu.ac.kr

## Table of contents

**Figure S1.** Effect of loading amount of N-rGO on SPCE surface in presence of 0.01 mM  $\text{H}_2\text{O}_2$  in 0.1 M PBS of pH 7.0 at scan rate of  $50 \text{ mVs}^{-1}$ .

**Figure S2.** CV curves of the N-rGO/SPCE in presence of 0.01 mM  $\text{H}_2\text{O}_2$  in 0.1 M PBS of different pH (3, 5, 7, 9, and 11) at scan rate of  $50 \text{ mVs}^{-1}$ .

**Figure S3.** CV curves (a) of SPCE in presence of different concentration of  $\text{H}_2\text{O}_2$  (0.01, 0.05, 0.1, 0.2, 0.3, 0.4, 0.5, 0.6, 0.8, and 1.0 mM) in 0.1 M PBS of pH 7.0 at scan rate of  $50 \text{ mVs}^{-1}$  and corresponding linear calibration plot (b) between peak current response versus concentration of  $\text{H}_2\text{O}_2$ .

**Figure S4.** CV curves (a) of SPCE in presence 0.01 mM  $\text{H}_2\text{O}_2$  in 0.1 M PBS of pH 7.0 at different applied scan rates ( $50\text{--}500 \text{ mVs}^{-1}$ ) and corresponding linear calibration plot (b) between peak current response versus square root of scan rate.

**Figure S5.** LSV curves of SPCE in absence (black) and presence (red) of interfering molecules (glucose, chlorophenol, hydrazine, uric acid, urea, dopamine, ascorbic acid, and nitro-phenol) in 0.05 mM  $\text{H}_2\text{O}_2$  in 0.1 M PBS of pH 7.0 at scan rate of  $50 \text{ mVs}^{-1}$ .

**Figure S6.** Chronoamperometry curve (a) of N-rGO/SPCE in presence of different concentration of  $\text{H}_2\text{O}_2$ . Calibration curve (b) between current response versus concentration of  $\text{H}_2\text{O}_2$ .

**Figure S7.** Selectivity test of N-rGO/SPCE towards  $\text{H}_2\text{O}_2$  determination in presence of various interfering molecules.

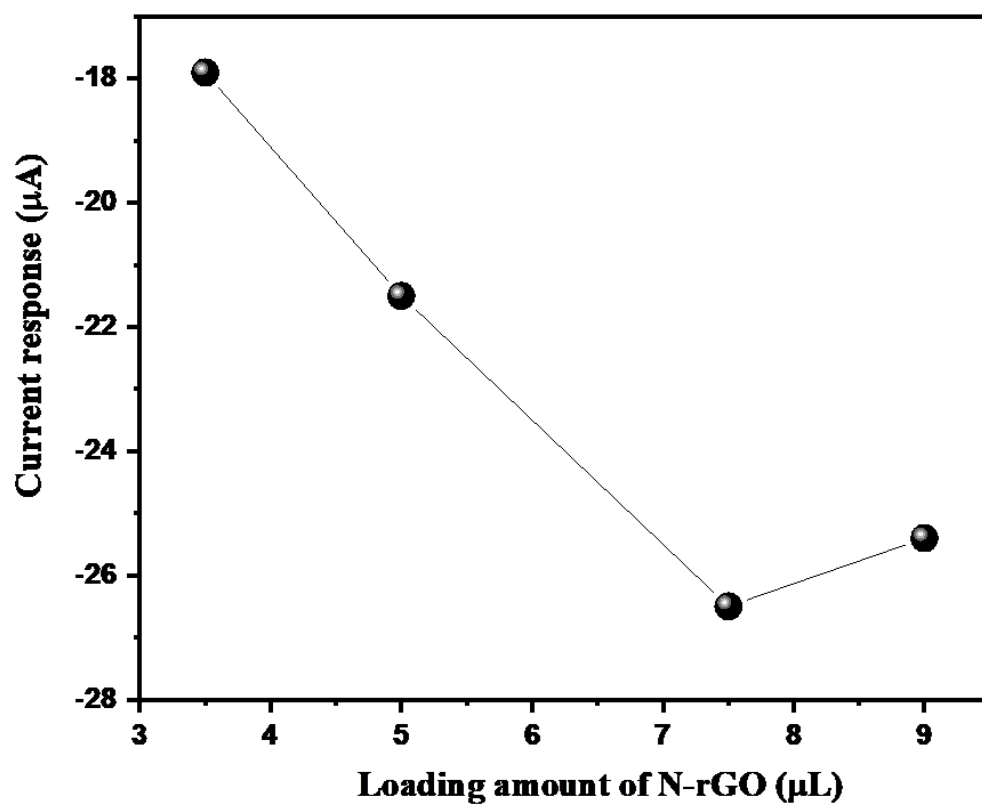

**Figure S1.** Effect of loading amount of N-rGO on SPCE surface in presence of 0.01 mM  $\text{H}_2\text{O}_2$  in 0.1 M PBS of pH 7.0 at scan rate of  $50 \text{ mVs}^{-1}$ .

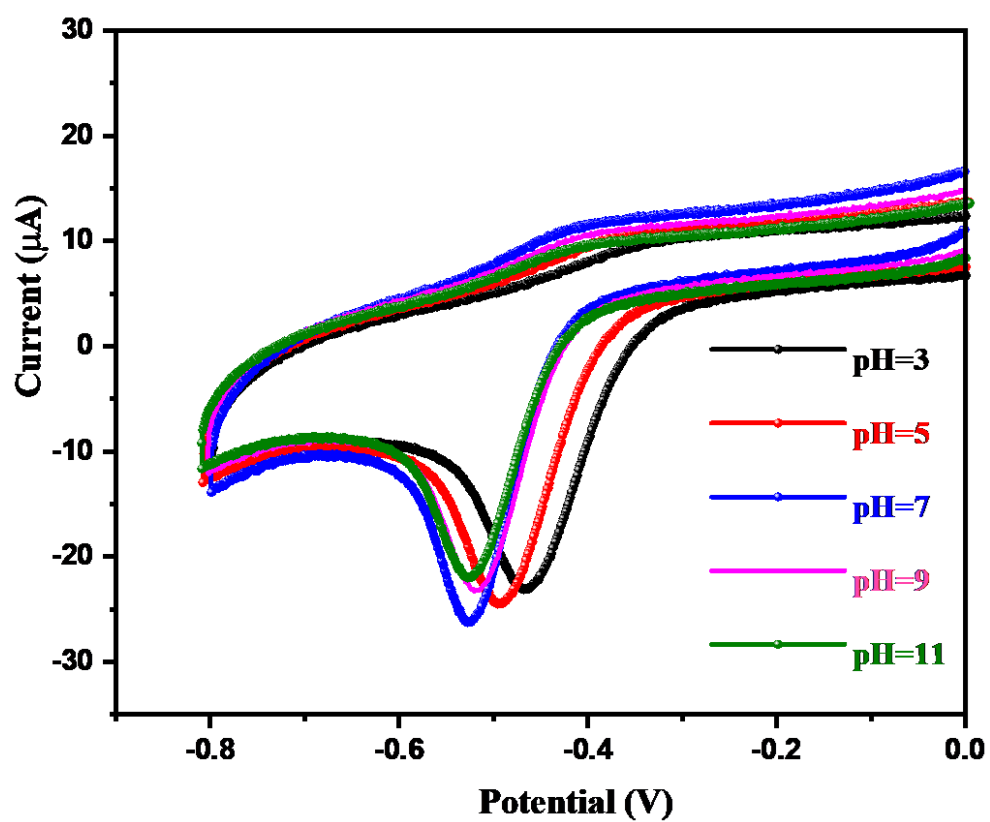

**Figure S2.** CV curves of the N-rGO/SPCE in presence of 0.01 mM  $\text{H}_2\text{O}_2$  in 0.1 M PBS of different pH (3,5,7,9, and 11) at scan rate of  $50 \text{ mVs}^{-1}$ .

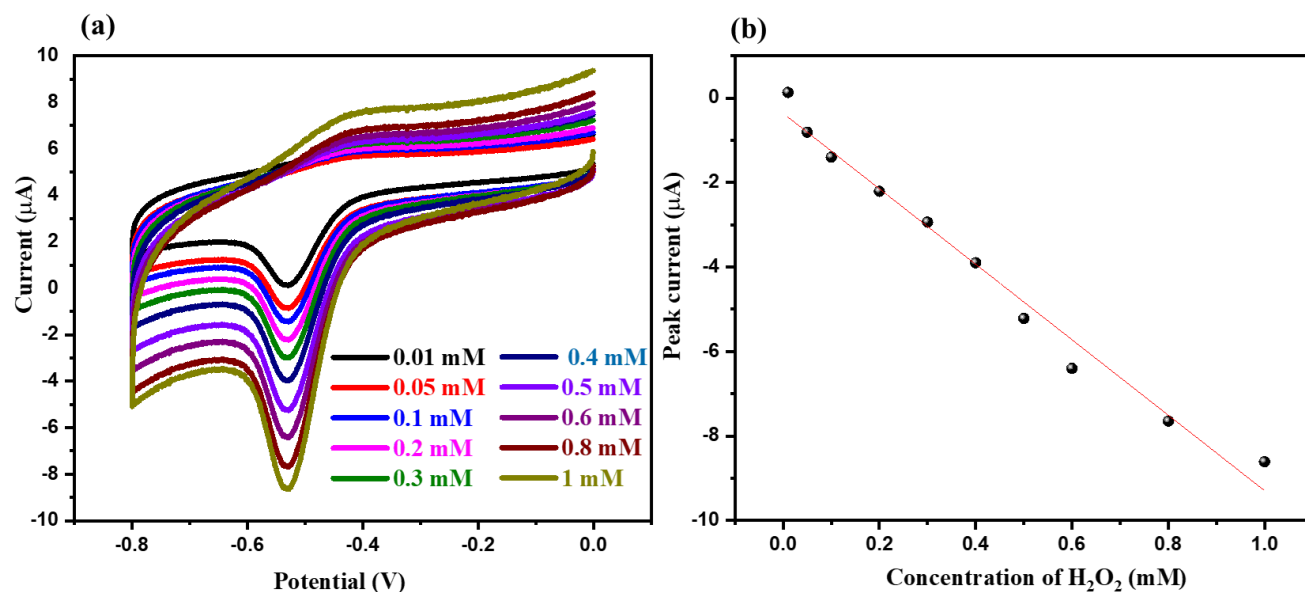

**Figure S3.** CV curves (a) of SPCE in presence of different concentration of  $\text{H}_2\text{O}_2$  (0.01, 0.05, 0.1, 0.2, 0.3, 0.4, 0.5, 0.6, 0.8, and 1.0 mM) in 0.1 M PBS of pH 7.0 at scan rate of 50  $\text{mVs}^{-1}$  and corresponding linear calibration plot (b) between peak current response versus concentration of  $\text{H}_2\text{O}_2$ .

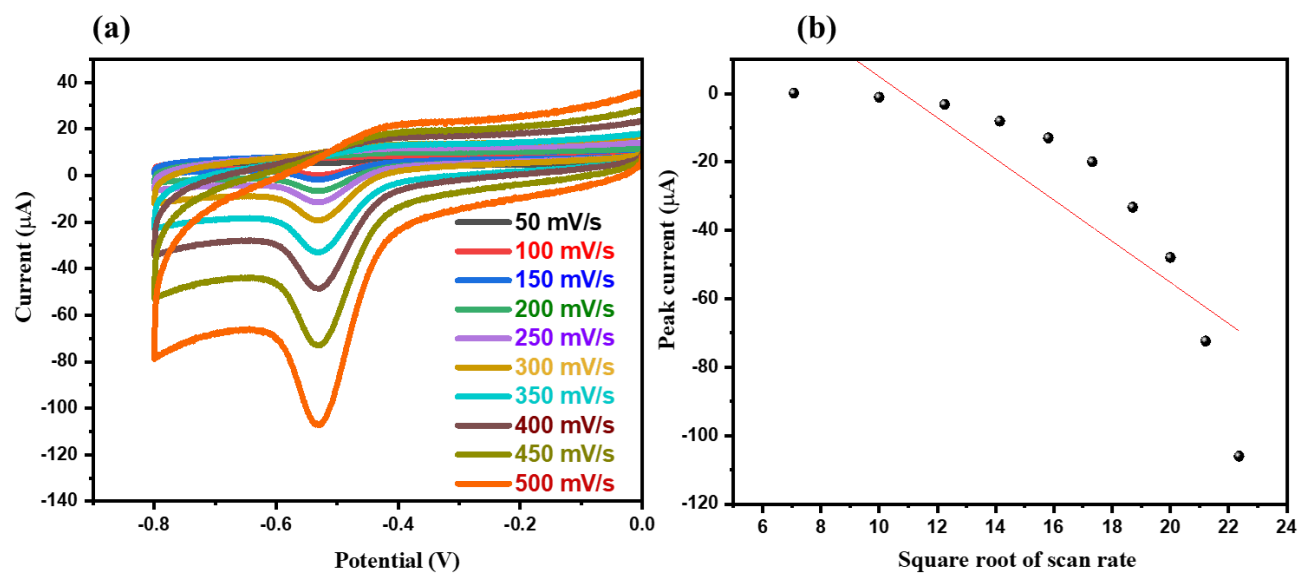

**Figure S4.** CV curves (a) of SPCE in presence 0.01 mM  $\text{H}_2\text{O}_2$  in 0.1 M PBS of pH 7.0 at different applied scan rates (50-500  $\text{mVs}^{-1}$ ) and corresponding linear calibration plot (b) between peak current response versus square root of scan rate.

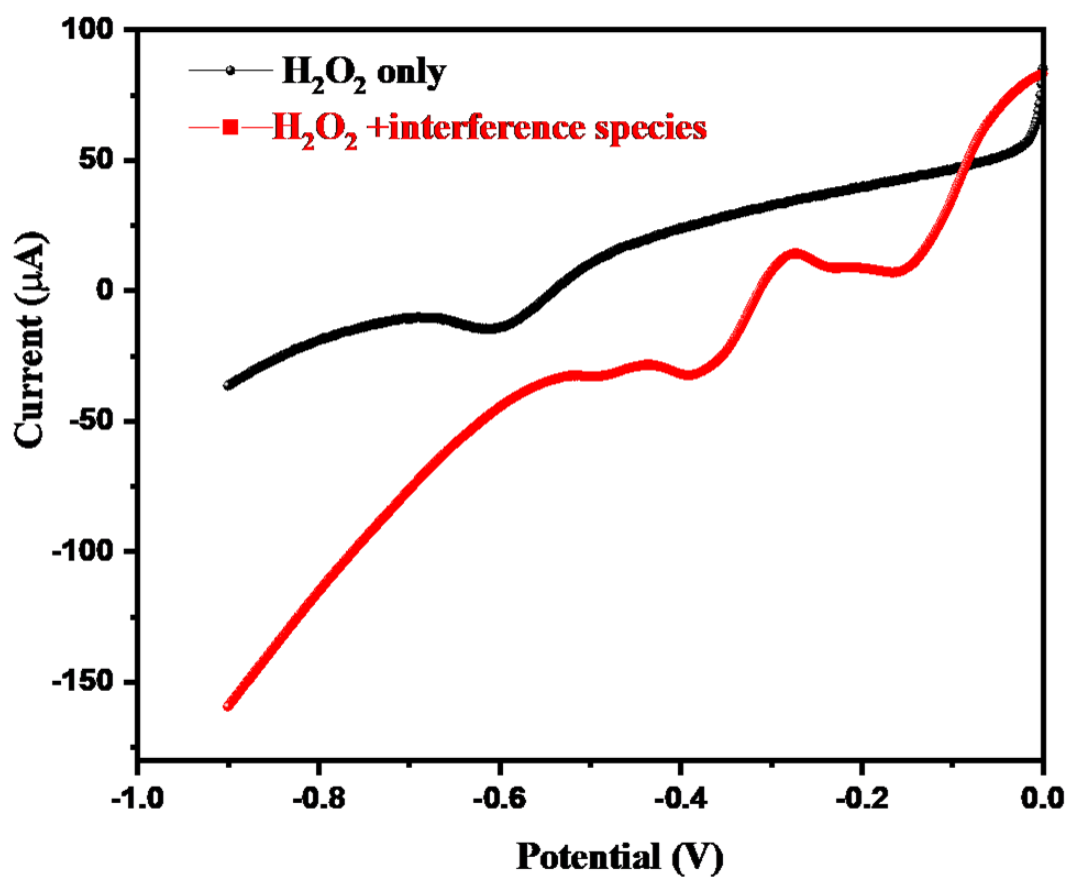

**Figure S5.** LSV curves of SPCE in absence (black) and presence (red) of interfering molecules (glucose, chlorophenol, hydrazine, uric acid, urea, dopamine, ascorbic acid, and nitro-phenol) in 0.05 mM H<sub>2</sub>O<sub>2</sub> in 0.1 M PBS of pH 7.0 at scan rate of 50 mVs<sup>-1</sup>.

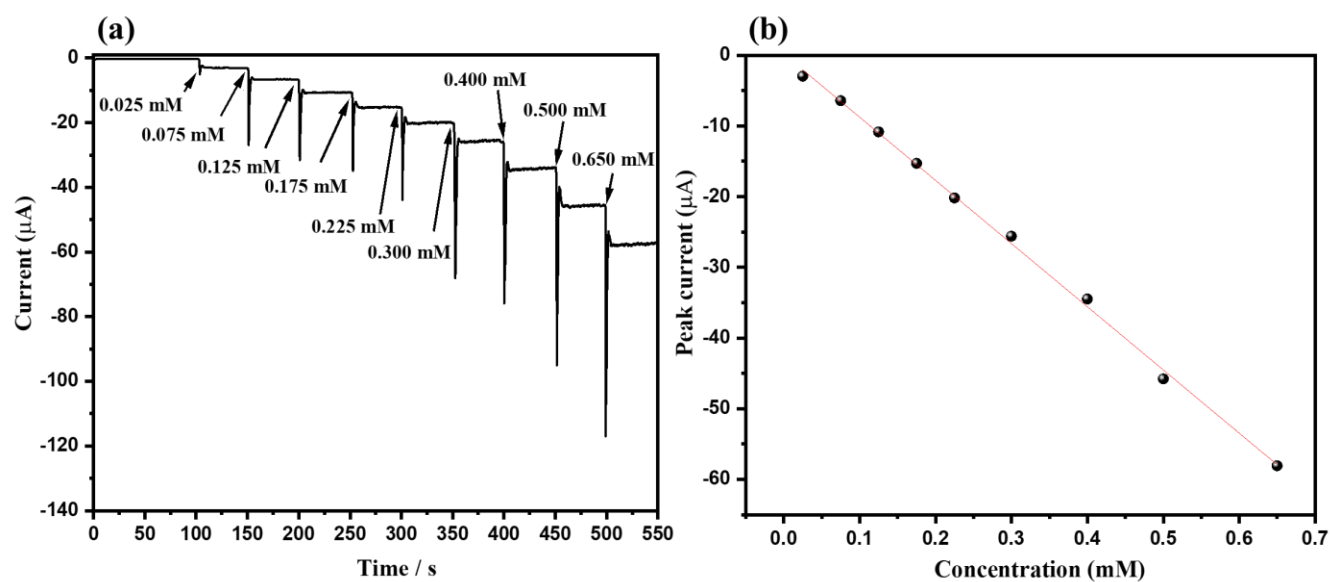

**Figure S6.** Chronoamperometry curve (a) of N-rGO/SPCE in presence of different concentration of  $\text{H}_2\text{O}_2$ . Calibration curve (b) between current response versus concentration of  $\text{H}_2\text{O}_2$ .



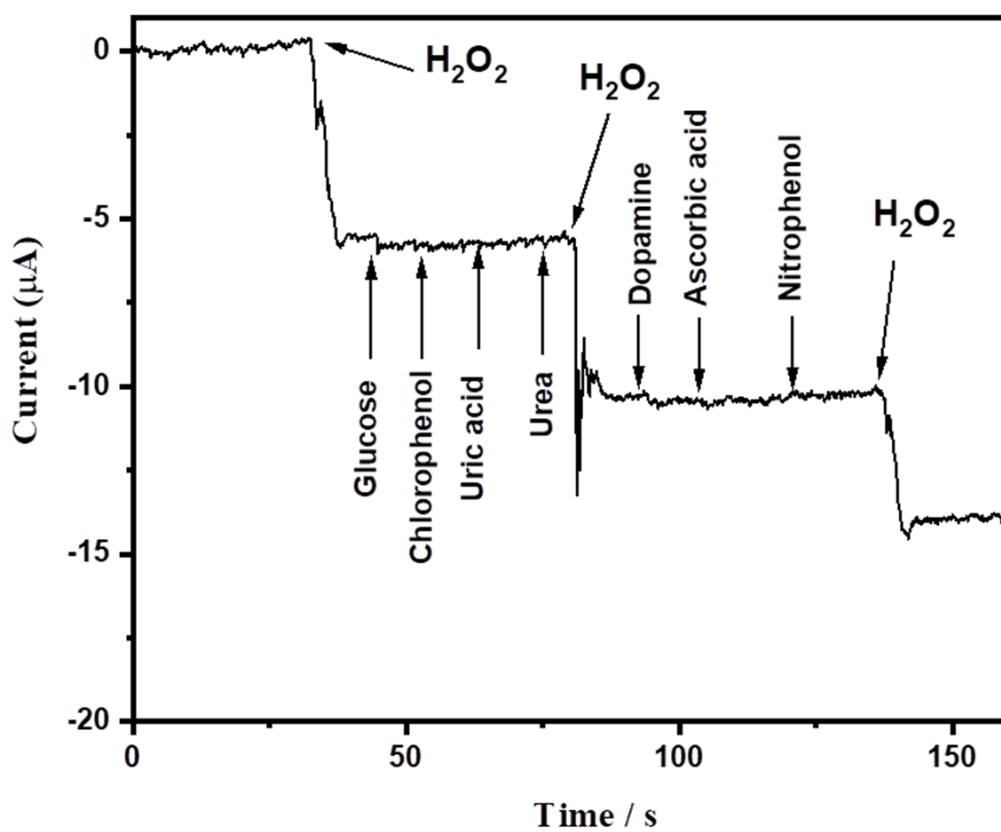

**Figure S7.** Selectivity test of N-rGO/SPCE towards  $\text{H}_2\text{O}_2$  determination in presence of various interfering molecules. (concentration of  $\text{H}_2\text{O}_2$  = 0.05 mM, concentration of interfering molecules = 0.25 mM).
